# Supplementary material
Source: HighWire-hosted journal article supplement (https://thorax.bmj.com/content/thoraxjnl-2020-216504)
Supplement: inline-supplementary-material-2 [file inline-supplementary-material-2.pdf]

**Supplementary table 1.** Patient characteristics at baseline (n=161)

| Characteristic          | All patients<br>(n = 161) |
|-------------------------|---------------------------|
| Age (yr), mean (SD)     | 63.3 (9.2)                |
| Gender, male            | 82 (50.9)                 |
| Ethnicity, Caucasian    | 151 (93.8)                |
| ECOG performance score  |                           |
| 0 or 1                  | 140 (87.0)                |
| ≥ 2                     | 19 (11.8)                 |
| Missing                 | 2 (1.2)                   |
| Packyears               | 36.9 (33.9)               |
| Never smokers           | 4 (2.5)                   |
| Type of tumor           |                           |
| Adenocarcinoma          | 156 (96.9)                |
| Large cell carcinoma    | 5 (3.1)                   |
| Cancer stage            |                           |
| Locally advanced (IIIB) | 21 (13.0)                 |
| Metastatic (IV)         | 140 (87.0)                |
| Line of therapy         |                           |
| First-line              | 147 (91.3)                |
| Second-line             | 14 (8.7)                  |
| Combination therapy     |                           |
| Cisplatin               | 99 (61.5)                 |
| Carboplatin             | 59 (36.6)                 |
| Monotherapy             | 3 (1.9)                   |
| Comorbidity             |                           |
| Cardiovascular disease  | 68 (42.2)                 |
| COPD                    | 23 (14.3)                 |
| Diabetes                | 22 (13.7)                 |

Data are expressed as numbers (%) unless stated otherwise. Abbreviations: SD, standard deviation.
