# Supplementary material
Source: HighWire-hosted journal article supplement (https://thorax.bmj.com/content/thoraxjnl-2020-216504)
Supplement: inline-supplementary-material-3 [file inline-supplementary-material-3.pdf]

**Supplementary Table 2.** Associations of polymorphisms with objective tumor response (n=122)

| Endpoint   | SNP            | Model*                     | Genotype                                         | Significance Test   | Univariable OR (95% CI) | p-value |
|------------|----------------|----------------------------|--------------------------------------------------|---------------------|-------------------------|---------|
|            | <i>ATIC</i>    | Recessive                  | CC vs CT + TT                                    | Fisher's exact      | 0.90 (0.38 – 2.14)      | 0.810   |
|            | <i>TYMS</i>    | High + intermediate vs low | 3G/3G +3G/3C,<br>2R/3G vs 2R/2R,<br>2R/3C, 3C/3C | Chi-squared         | 0.68 (0.31 – 1.52)      | 0.351   |
| <b>ORR</b> | <i>SLC19A1</i> | Recessive                  | TT vs CT + CC                                    | Fisher's Exact      | 3.31 (1.06 – 10.33)     | 0.063   |
|            | <i>GGH</i>     | Dominant                   | GA + AA vs GG                                    | Chi-squared         | 1.86 (0.84 – 4.11)      | 0.12    |
|            | <i>FPGS</i>    | Dominant                   | TT + CT vs CC                                    | Chi-squared         | 0.62 (0.29 – 1.36)      | 0.235   |
|            | <i>ABCC2</i>   | Dominant                   | TT + CT vs CC                                    | Fisher's exact      | 1.23 (0.56 – 2.70)      | 0.610   |
|            | <i>DHFR</i>    | Additive                   | TT → CT → CC                                     | Logistic regression | 1.12 (0.61 – 2.06)      | 0.720   |
|            | <i>MTHFR</i>   | Recessive                  | TT vs CT + CC                                    | Fisher's exact      | 0.91 (0.22 – 3.70)      | 0.892   |

\*Best fitting model. Abbreviations: OR, odds ratio; ORR, objective response rate
