# Supplementary material
Source: HighWire-hosted journal article supplement (https://thorax.bmj.com/content/thoraxjnl-2020-216504)
Supplement: inline-supplementary-material-5 [file inline-supplementary-material-5.pdf]

**Supplementary Table 3.** Adverse events in patients with first- and second-line treatment (n=161)

| Adverse event                          | Frequency (%) |                |
|----------------------------------------|---------------|----------------|
|                                        | All grades    | Grade $\geq$ 3 |
| Treatment-related <sup>a</sup>         |               |                |
| Any event                              | 158 (98)      | 99 (62)        |
| <i>Clinical</i>                        |               |                |
| Any event                              | 157 (98)      | 68 (42)        |
| Fatigue                                | 140 (87)      | 23 (14)        |
| Nausea and vomiting                    | 105 (65)      | 4 (2)          |
| Anorexia                               | 101 (63)      | 10 (6)         |
| Oral mucositis/stomatitis              | 75 (47)       | 5 (3)          |
| Constipation                           | 66 (41)       | 2 (1)          |
| Taste alteration                       | 62 (39)       | 0              |
| Dry skin                               | 53 (33)       | 0              |
| Dizziness                              | 49 (30)       | 0              |
| Neuropathy sensory                     | 46 (29)       | 0              |
| Dry eyes/watering eyes                 | 44 (27)       | 0              |
| Diarrhea                               | 41 (25)       | 4 (2)          |
| Infection with normal neutrophil count | 38 (24)       | 19 (12)        |
| Dysphagia                              | 37 (23)       | 2 (1)          |
| Rash                                   | 30 (19)       | 0              |
| Weight loss                            | 29 (18)       | 0              |
| Alopecia                               | 24 (15)       | 0              |
| Abdominal distension                   | 20 (12)       | 1 (1)          |
| Pruritus                               | 19 (12)       | 0              |
| <i>Laboratory</i>                      |               |                |
| Any event                              | 154 (96)      | 68 (42)        |
| Anemia                                 | 139 (86)      | 17 (11)        |
| Decreased white cell count             | 106 (66)      | 27 (17)        |
| Decreased neutrophil count             | 97 (60)       | 47 (29)        |
| Alanine aminotransferase elevation     | 80 (50)       | 2 (1)          |
| Decreased thrombocyte count            | 78 (48)       | 17 (11)        |
| Alkaline phosphatase elevation         | 63 (39)       | 0              |
| Aspartate aminotransferase elevation   | 68 (38)       | 2 (1)          |
| Blood creatinine level elevation       | 54 (34)       | 2 (1)          |

Listed are adverse events that are reported in at least 10% of the patients. <sup>a</sup>Adverse events were scored as treatment-related if investigator defined relatedness as possibly, probably or definitely.
