# Supplementary material
Source: HighWire-hosted journal article supplement (https://thorax.bmj.com/content/thoraxjnl-2020-216504)
Supplement: inline-supplementary-material-6 [file inline-supplementary-material-6.pdf]

**Supplementary Table 4.** Association between SNPs and chemotherapy-related toxicity with  $p < 0.1$  in the univariable analysis

| Endpoint                        | SNP            | Model                      | Univariable<br>HR (95% CI) | p-value |
|---------------------------------|----------------|----------------------------|----------------------------|---------|
| Severe toxicity                 | <i>ATIC</i>    | Recessive                  | 1.54 (1.01-2.35)           | 0.045   |
| Severe toxicity, laboratory     | <i>ATIC</i>    | Recessive                  | 1.89 (1.15-3.10)           | 0.011†  |
|                                 | <i>MTHFR</i>   | Recessive                  | 2.09 (1.03-4.23)           | 0.041   |
| Severe toxicity, clinical       | <i>ATIC</i>    | Recessive                  | 1.80 (1.10-2.96)           | 0.012†  |
| <i>Clinical</i>                 |                |                            |                            |         |
| Anorexia, all grade             | <i>FPGS</i>    | Dominant                   | 0.68 (0.45-1.02)           | 0.059   |
|                                 | <i>ATIC</i>    | Dominant                   | 0.68 (0.44-1.05)           | 0.078   |
| Anorexia, severe                | <i>SLC19A1</i> | Dominant                   | 0.15 (0.03-0.72)           | 0.008†  |
| Diarrhea, all grade             | <i>ATIC</i>    | Recessive                  | 2.01 (1.07-3.78)           | 0.012†  |
|                                 | <i>MTHFR</i>   | Dominant                   | 0.52 (0.28-0.98)           | 0.042   |
| Fatigue, all grade              | <i>FPGS</i>    | Dominant                   | 0.72 (0.50-1.02)           | 0.061   |
| Fatigue, severe                 | <i>ATIC</i>    | Recessive                  | 3.33 (1.47-7.56)           | 0.004†  |
|                                 | <i>DHFR</i>    | Recessive                  | 3.80 (1.41-10.27)          | 0.018   |
|                                 | <i>SLC19A1</i> | Recessive                  | 2.36 (0.93-5.99)           | 0.071   |
|                                 | <i>ABCC2</i>   | Dominant                   | 2.28 (1.00-5.20)           | 0.050   |
| Nausea and vomiting, all grade  | <i>MTHFR</i>   | Recessive                  | 1.87 (1.00-3.51)           | 0.050   |
|                                 | <i>SLC19A1</i> | Recessive                  | 1.59 (0.94-2.68)           | 0.082   |
| Mucositis, all grade            | <i>ATIC</i>    | Recessive                  | 0.61 (0.35-1.08)           | 0.090   |
| Infection normal ANC, all grade | <i>ABCC2</i>   | Recessive                  | 3.83 (1.18-12.51)          | 0.026   |
| Taste alteration, all grade     | <i>ATIC</i>    | Recessive                  | 0.56 (0.29-1.08)           | 0.085   |
|                                 | <i>GGH</i>     | Dominant                   | 0.66 (0.40-1.08)           | 0.097   |
| Constipation, all grade         | <i>SLC19A1</i> | Dominant                   | 0.60 (0.37-0.98)           | 0.042   |
|                                 | <i>FPGS</i>    | Recessive                  | 1.79 (1.02-3.16)           | 0.043   |
| Dry and watery eyes, all grade  | <i>ABCC2</i>   | Dominant                   | 0.50 (0.25-0.98)           | 0.044   |
| Dysphagia, all grade            | <i>ABCC2</i>   | Recessive                  | 3.35 (1.03-10.93)          | 0.045   |
|                                 | <i>ATIC</i>    | Recessive                  | 0.40 (0.16-1.02)           | 0.055   |
| Alopecia, all grade             | <i>ATIC</i>    | Recessive                  | 2.57 (1.15-5.75)           | 0.021   |
|                                 | <i>TYMS</i>    | High + intermediate vs low | 0.29 (0.10-0.86)           | 0.025   |
|                                 | <i>MTHFR</i>   | Recessive                  | 2.72 (0.93-7.98)           | 0.068   |
| Abdominal distension, all grade | <i>MTHFR</i>   | Recessive                  | 3.31 (1.11-9.90)           | 0.032   |
|                                 | <i>TYMS</i>    | High + intermediate vs low | 0.35 (0.12-1.05)           | 0.062   |
|                                 | <i>ABCC2</i>   | Dominant                   | 2.13 (0.88-5.14)           | 0.093   |
| <i>Laboratory</i>               |                |                            |                            |         |
| Anemia, severe                  | <i>ATIC</i>    | Recessive                  | 4.38 (1.67-11.52)          | 0.003†  |
|                                 | <i>DHFR</i>    | Recessive                  | 4.28 (1.39-13.15)          | 0.019   |
| Leukopenia, severe              | <i>DHFR</i>    | Dominant                   | 2.85 (1.28-6.36)           | 0.019   |
|                                 | <i>ATIC</i>    | Recessive                  | 2.01 (0.93-4.32)           | 0.076   |
| Neutropenia, severe             | <i>ATIC</i>    | Recessive                  | 2.24 (1.25-4.03)           | 0.007†  |
|                                 | <i>DHFR</i>    | Dominant                   | 1.63 (0.92-2.90)           | 0.094   |
|                                 | <i>GGH</i>     | Dominant                   | 1.70 (0.91-3.18)           | 0.097   |
| Trombopenia, severe             | <i>ATIC</i>    | Recessive                  | 2.63 (1.01-6.81)           | 0.047   |

† significant  $p < 0.1$  after false discovery rate correction. Abbreviations: HR, hazard ratio; CI, confidence interval
