# Supplementary material
Source: HighWire-hosted journal article supplement (https://thorax.bmj.com/content/thoraxjnl-2020-216504)
Supplement: inline-supplementary-material-7 [file inline-supplementary-material-7.pdf]

**Supplementary Table 5.** SNP covariable analysis on pemetrexed clearance in the full model using stepwise forward inclusion

| Factor             | Compared genotypes                                      | OFV           | $\Delta$ OFV* |
|--------------------|---------------------------------------------------------|---------------|---------------|
| <b>Ordinal</b>     | <b>Structural base model + eGFR on CL and BSA on Vc</b> | <b>-743.8</b> |               |
| <i>SLC19A1</i>     | Mut/Mut vs Mut/WT vs WT/WT                              | -745.3        | -1.6          |
| <i>GGH</i>         | Mut/Mut vs Mut/WT vs WT/WT                              | -745.1        | -1.3          |
| <i>FPGS</i>        | Mut/Mut vs Mut/WT vs WT/WT                              | -744.8        | -1.0          |
| <i>ABCC2</i>       | Mut/Mut vs Mut/WT vs WT/WT                              | -744.3        | -0.6          |
| <hr/>              |                                                         |               |               |
| <b>Dichotomous</b> |                                                         | <b>-743.8</b> |               |
| <i>SLC19A1</i>     | WT/WT vs other                                          | -744.3        | -0.5          |
|                    | Mut/Mut vs other                                        | -744.4        | -0.6          |
| <i>GGH</i>         | WT/WT vs other                                          | -744.7        | -0.9          |
|                    | Mut/Mut vs other                                        | -743.8        | -0.0          |
| <i>FPGS</i>        | WT/WT vs other                                          | -744.5        | -0.8          |
|                    | Mut/Mut vs other                                        | -744.3        | -0.5          |
| <i>ABCC2</i>       | WT/WT vs other                                          | -743.8        | -0.0          |
|                    | Mut/Mut vs other                                        | -744.2        | -0.5          |

\* To determine model fit,  $\Delta$ OFV was used according to the likelihood ratio test following a chi-squared distribution. In the stepwise forward inclusion, the threshold for significant improvement of the model was set at  $p < 0.01$  (dichotomous:  $\Delta$ OFV > 6.64, df =1 or ordinal:  $\Delta$ OFV > 9.21, df =2). In the backward elimination significant worsening of the model was set at  $p < 0.005$  ( $\Delta$  OFV > 7.88, df =1).

†Structural model: Two-compartment model in terms of pemetrexed clearance (CL), central distribution volume (Vc), intercompartmental clearance (Q) and peripheral volume of distribution (Vp), including between-patient variability on CL and proportional error model describing between-patient variability

Abbreviations: OFV, objective function value; CL, pemetrexed clearance; Vc, central volume of distribution; Vp, peripheral volume of distribution; BSA, body surface area; eGFR, estimated glomerular filtration rate; Mut, mutant; WT, wildtype
